# Supplementary material for: Atomistic Insights into the Influence of High Concentration H2O2/H2O on Al Nanoparticles Combustion: ReaxFF Molecules Dynamics Simulation
Source: MDPI journal article supplement (doi:10.3390/molecules29071567), 2024-03-31
Supplement: s1 [file s1]

## Supporting Information

### **Atomistic Insights into the Influence of High Concentration H<sub>2</sub>O<sub>2</sub>/H<sub>2</sub>O on Al Nanoparticles Combustion: ReaxFF molecules dynamics simulation**

**Xindong Yu <sup>1</sup>, Pengtu Zhang <sup>2</sup>, Heng Zhang <sup>1\*</sup> and Shiling Yuan<sup>1\*</sup>**

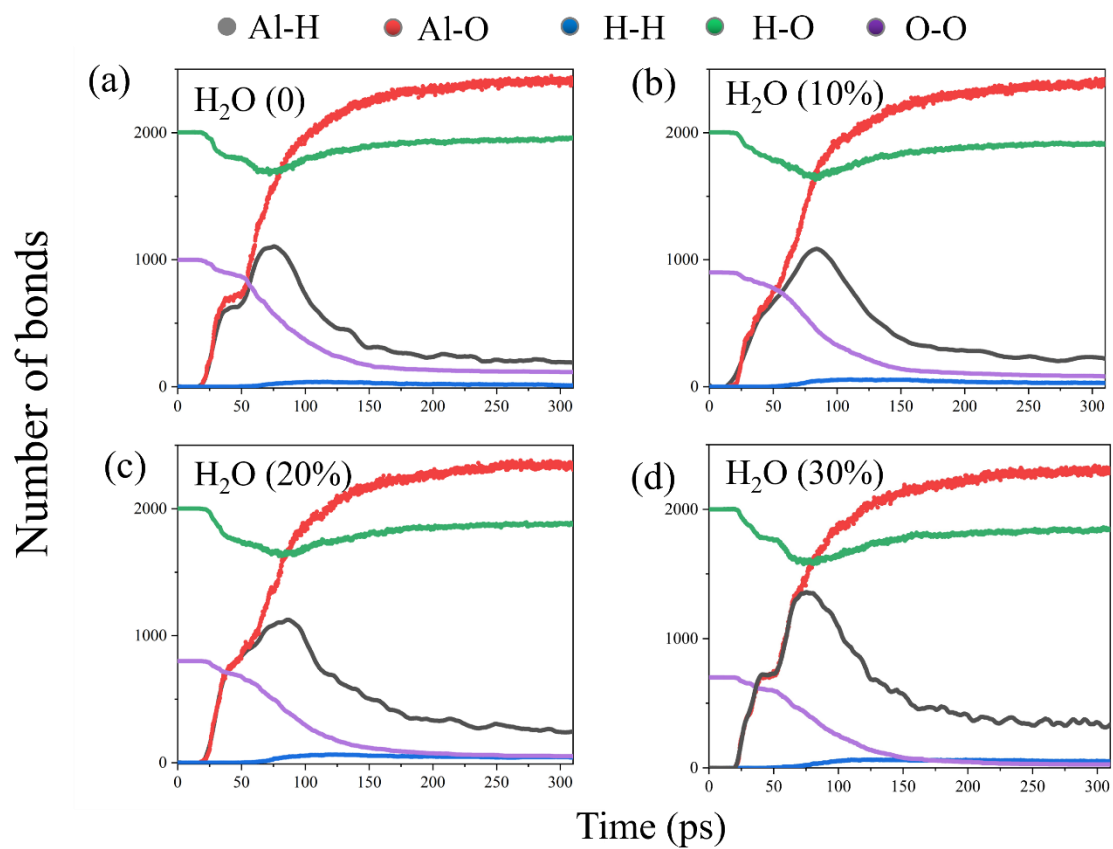

**Figure S1.** Evolution of the number of H-H, H-O, Al-H, Al-O, O-O bonds for each system.

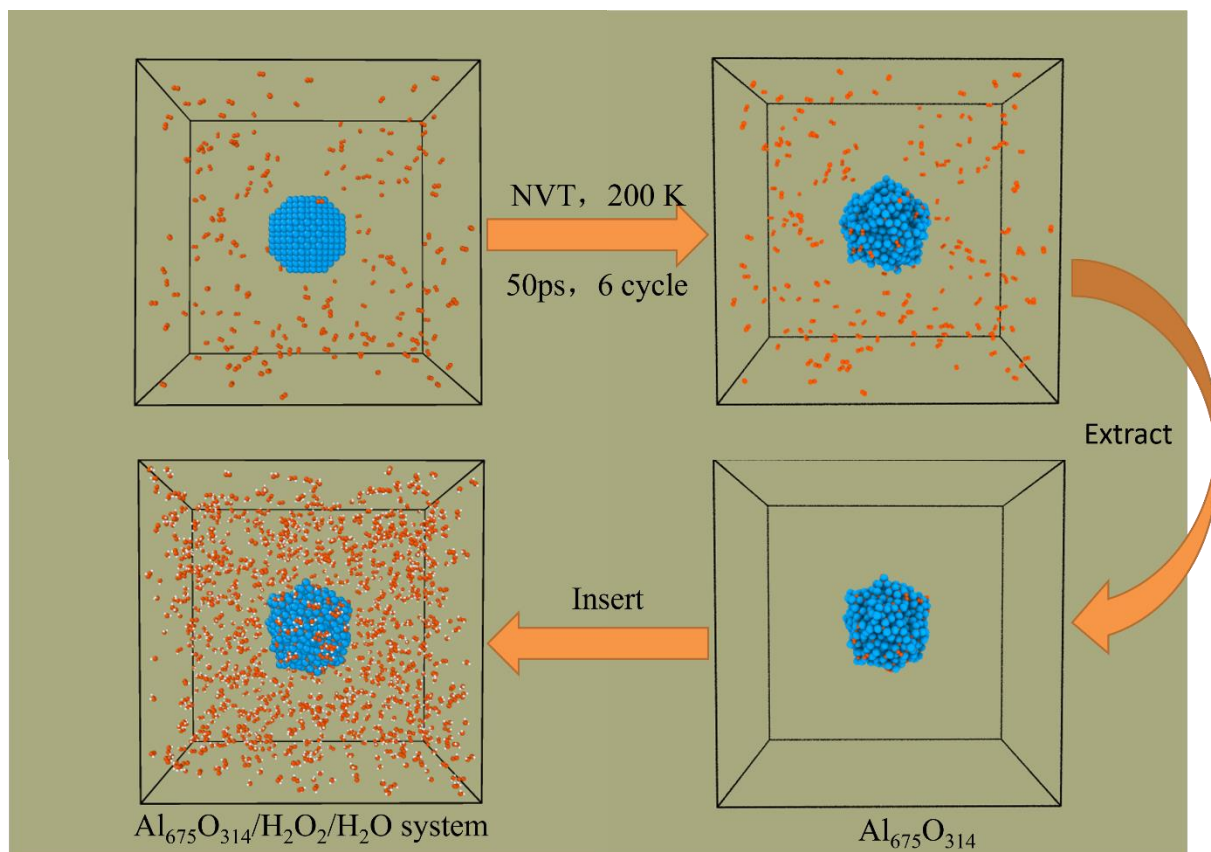

**Figure S2.** Formation of oxide layer on the surface of ANPs.
